# Supplementary material for: Accurate genotyping of single cells with Octopus
Source: Research Square preprint supplement (doi:10.21203/rs.3.rs-583831/v1), 2021-06-03
Supplement: Supplementary file 2 [file 750c7e88224dc9acd740788c.xlsx]

## Sheet: Sheet1
	Control	Test	Group	Filtered	Match	Caller	True-pos-baseline	True-pos-call	False-pos	False-neg	Precision	Sensitivity	F-measure
0	Hunamp	IL-2	clones_and_cells	TRUE	GT	Octopus	4231116	4264444	396115	207812	0.915	0.9532	0.9337
1	Hunamp	IL-2	clones_and_cells	TRUE	GT	MonoVar	3550858	3551238	1895346	886898	0.652	0.8001	0.7185
2	Hunamp	IL-2	clones_and_cells	TRUE	GT	SCcaller	2586109	2586088	121292	1852873	0.9552	0.5826	0.7238
3	Hunamp	IL-2	clones_and_cells	TRUE	GT	Prosolo	2892131	2892313	640816	1546838	0.8186	0.6515	0.7256
4	Hunamp	IL-3	clones_and_cells	TRUE	GT	Octopus	4225959	4259192	397862	212969	0.9146	0.952	0.9329
5	Hunamp	IL-3	clones_and_cells	TRUE	GT	MonoVar	3051955	3052246	1905546	1386037	0.6156	0.6877	0.6497
6	Hunamp	IL-3	clones_and_cells	TRUE	GT	SCcaller	2001148	2001127	204009	2437834	0.9075	0.4508	0.6024
7	Hunamp	IL-3	clones_and_cells	TRUE	GT	Prosolo	2748947	2749081	735158	1690022	0.789	0.6193	0.6939
8	Hunamp	IL-4	clones_and_cells	TRUE	GT	Octopus	4229441	4262721	398261	209487	0.9146	0.9528	0.9333
9	Hunamp	IL-4	clones_and_cells	TRUE	GT	MonoVar	3381099	3381450	1897461	1056896	0.6406	0.7619	0.696
10	Hunamp	IL-4	clones_and_cells	TRUE	GT	SCcaller	1841787	1841766	93638	2597195	0.9516	0.4149	0.5779
11	Hunamp	IL-4	clones_and_cells	TRUE	GT	Prosolo	2863207	2863372	665802	1575762	0.8113	0.645	0.7187
12	Hunamp	IL-5	clones_and_cells	TRUE	GT	Octopus	4229936	4263212	397986	208992	0.9146	0.9529	0.9334
13	Hunamp	IL-5	clones_and_cells	TRUE	GT	MonoVar	3418619	3418945	1872727	1017823	0.6461	0.7706	0.7029
14	Hunamp	IL-5	clones_and_cells	TRUE	GT	SCcaller	1816071	1816033	84815	2622911	0.9554	0.4091	0.5729
15	Hunamp	IL-5	clones_and_cells	TRUE	GT	Prosolo	2871425	2871582	656373	1567544	0.814	0.6469	0.7209
16	Hunamp	IL11	clones_and_cells	TRUE	GT	Octopus	4230608	4263903	396997	208320	0.9148	0.9531	0.9336
17	Hunamp	IL11	clones_and_cells	TRUE	GT	MonoVar	3481064	3481441	1874502	956981	0.65	0.7844	0.7109
18	Hunamp	IL11	clones_and_cells	TRUE	GT	SCcaller	2375404	2375376	124148	2063578	0.9503	0.5351	0.6847
19	Hunamp	IL11	clones_and_cells	TRUE	GT	Prosolo	2879054	2879213	650012	1559915	0.8158	0.6486	0.7227
20	Hunamp	IL12	clones_and_cells	TRUE	GT	Octopus	4225158	4258384	399029	213770	0.9143	0.9518	0.9327
21	Hunamp	IL12	clones_and_cells	TRUE	GT	MonoVar	2980179	2980470	1974161	1457998	0.6016	0.6715	0.6346
22	Hunamp	IL12	clones_and_cells	TRUE	GT	SCcaller	1827504	1827510	207764	2611478	0.8979	0.4117	0.5645
23	Hunamp	IL12	clones_and_cells	TRUE	GT	Prosolo	2737325	2737451	745229	1701644	0.786	0.6167	0.6911
24	IL1C	IL-2	clones_and_cells	TRUE	GT	Octopus	4242713	4276658	383745	200628	0.9177	0.9548	0.9359
25	IL1C	IL-2	clones_and_cells	TRUE	GT	MonoVar	3555659	3556079	1890443	886508	0.6529	0.8004	0.7192
26	IL1C	IL-2	clones_and_cells	TRUE	GT	SCcaller	2586712	2586697	120684	1856682	0.9554	0.5821	0.7235
27	IL1C	IL-2	clones_and_cells	TRUE	GT	Prosolo	2895349	2895545	637583	1548032	0.8195	0.6516	0.726
28	IL1C	IL-3	clones_and_cells	TRUE	GT	Octopus	4237517	4271356	385537	205824	0.9172	0.9537	0.9351
29	IL1C	IL-3	clones_and_cells	TRUE	GT	MonoVar	3056348	3056663	1901206	1386064	0.6165	0.688	0.6503
30	IL1C	IL-3	clones_and_cells	TRUE	GT	SCcaller	2001973	2001957	203183	2441421	0.9079	0.4506	0.6022
31	IL1C	IL-3	clones_and_cells	TRUE	GT	Prosolo	2752002	2752150	732099	1691379	0.7899	0.6193	0.6943
32	IL1C	IL-4	clones_and_cells	TRUE	GT	Octopus	4240984	4274861	385951	202357	0.9172	0.9545	0.9355
33	IL1C	IL-4	clones_and_cells	TRUE	GT	MonoVar	3385471	3385849	1893119	1056943	0.6414	0.7621	0.6965
34	IL1C	IL-4	clones_and_cells	TRUE	GT	SCcaller	1842199	1842177	93226	2601195	0.9518	0.4146	0.5776
35	IL1C	IL-4	clones_and_cells	TRUE	GT	Prosolo	2866381	2866563	662619	1577000	0.8122	0.6451	0.7191
36	IL1C	IL-5	clones_and_cells	TRUE	GT	Octopus	4241498	4275384	385648	201843	0.9173	0.9546	0.9355
37	IL1C	IL-5	clones_and_cells	TRUE	GT	MonoVar	3422732	3423064	1868612	1018120	0.6469	0.7707	0.7034
38	IL1C	IL-5	clones_and_cells	TRUE	GT	SCcaller	1816155	1816114	84731	2627239	0.9554	0.4087	0.5725
39	IL1C	IL-5	clones_and_cells	TRUE	GT	Prosolo	2874313	2874475	653473	1569068	0.8148	0.6469	0.7212
40	IL1C	IL11	clones_and_cells	TRUE	GT	Octopus	4242279	4276192	384537	201062	0.9175	0.9547	0.9358
41	IL1C	IL11	clones_and_cells	TRUE	GT	MonoVar	3485647	3486043	1869858	956814	0.6509	0.7846	0.7115
42	IL1C	IL11	clones_and_cells	TRUE	GT	SCcaller	2375901	2375879	123649	2067493	0.9505	0.5347	0.6844
43	IL1C	IL11	clones_and_cells	TRUE	GT	Prosolo	2882234	2882416	646820	1561147	0.8167	0.6487	0.7231
44	IL1C	IL12	clones_and_cells	TRUE	GT	Octopus	4236737	4270558	386680	206604	0.917	0.9535	0.9349
45	IL1C	IL12	clones_and_cells	TRUE	GT	MonoVar	2984395	2984701	1969809	1458188	0.6024	0.6718	0.6352
46	IL1C	IL12	clones_and_cells	TRUE	GT	SCcaller	1828164	1828173	207106	2615230	0.8982	0.4114	0.5644
47	IL1C	IL12	clones_and_cells	TRUE	GT	Prosolo	2740211	2740348	742329	1703170	0.7869	0.6167	0.6915
48	Hunamp	IL-2	clones_and_cells	FALSE	GT	Octopus	4364789	4399937	427170	535995	0.9115	0.8906	0.9009
49	Hunamp	IL-2	clones_and_cells	FALSE	GT	MonoVar	3652485	3653000	1792028	1246421	0.6709	0.7456	0.7063
50	Hunamp	IL-2	clones_and_cells	FALSE	GT	SCcaller	2946646	2946615	204468	1954513	0.9351	0.6012	0.7319
51	Hunamp	IL-2	clones_and_cells	FALSE	GT	Prosolo	3108013	3108374	7790494	1792964	0.2852	0.6342	0.3935
52	Hunamp	IL-3	clones_and_cells	FALSE	GT	Octopus	4359337	4394391	429004	541463	0.9111	0.8895	0.9002
53	Hunamp	IL-3	clones_and_cells	FALSE	GT	MonoVar	3136417	3136837	1820017	1763079	0.6328	0.6402	0.6365
54	Hunamp	IL-3	clones_and_cells	FALSE	GT	SCcaller	2266364	2266324	286764	2634795	0.8877	0.4624	0.6081
55	Hunamp	IL-3	clones_and_cells	FALSE	GT	Prosolo	2960709	2961046	13334047	1939831	0.1817	0.6042	0.2794
56	Hunamp	IL-4	clones_and_cells	FALSE	GT	Octopus	4363022	4398116	429469	537751	0.911	0.8903	0.9005
57	Hunamp	IL-4	clones_and_cells	FALSE	GT	MonoVar	3469801	3470282	1805314	1427496	0.6578	0.7085	0.6822
58	Hunamp	IL-4	clones_and_cells	FALSE	GT	SCcaller	2107587	2107533	157139	2793572	0.9306	0.43	0.5882
59	Hunamp	IL-4	clones_and_cells	FALSE	GT	Prosolo	3073270	3073550	9502779	1827541	0.2444	0.6271	0.3517
60	Hunamp	IL-5	clones_and_cells	FALSE	GT	Octopus	4363407	4398480	429290	537393	0.9111	0.8903	0.9006
61	Hunamp	IL-5	clones_and_cells	FALSE	GT	MonoVar	3509398	3509835	1780937	1388711	0.6634	0.7165	0.6889
62	Hunamp	IL-5	clones_and_cells	FALSE	GT	SCcaller	2084969	2084914	147292	2816190	0.934	0.4254	0.5846
63	Hunamp	IL-5	clones_and_cells	FALSE	GT	Prosolo	3080680	3081045	9142292	1820228	0.2521	0.6286	0.3598
64	Hunamp	IL11	clones_and_cells	FALSE	GT	Octopus	4364123	4399240	428247	536677	0.9113	0.8905	0.9008
65	Hunamp	IL11	clones_and_cells	FALSE	GT	MonoVar	3572894	3573381	1781906	1326909	0.6673	0.7292	0.6969
66	Hunamp	IL11	clones_and_cells	FALSE	GT	SCcaller	2713348	2713346	208011	2187800	0.9288	0.5536	0.6937
67	Hunamp	IL11	clones_and_cells	FALSE	GT	Prosolo	3095258	3095575	8605486	1805469	0.2646	0.6316	0.3729
68	Hunamp	IL12	clones_and_cells	FALSE	GT	Octopus	4358231	4393276	430531	542580	0.9107	0.8893	0.8999
69	Hunamp	IL12	clones_and_cells	FALSE	GT	MonoVar	3063697	3064084	1889933	1836282	0.6185	0.6252	0.6219
70	Hunamp	IL12	clones_and_cells	FALSE	GT	SCcaller	2080138	2080160	291000	2821021	0.8773	0.4244	0.5721
71	Hunamp	IL12	clones_and_cells	FALSE	GT	Prosolo	2944971	2945240	12692944	1955657	0.1883	0.6009	0.2868
72	IL1C	IL-2	clones_and_cells	FALSE	GT	Octopus	4422086	4458179	368861	989193	0.9236	0.8172	0.8671
73	IL1C	IL-2	clones_and_cells	FALSE	GT	MonoVar	3686944	3687534	1757725	1722638	0.6772	0.6816	0.6794
74	IL1C	IL-2	clones_and_cells	FALSE	GT	SCcaller	2948767	2948714	202417	2463001	0.9358	0.5449	0.6887
75	IL1C	IL-2	clones_and_cells	FALSE	GT	Prosolo	3200748	3201241	7697774	2210765	0.2937	0.5915	0.3925
76	IL1C	IL-3	clones_and_cells	FALSE	GT	Octopus	4416402	4452399	370938	994882	0.9231	0.8161	0.8663
77	IL1C	IL-3	clones_and_cells	FALSE	GT	MonoVar	3165217	3165701	1791497	2245090	0.6386	0.585	0.6106
78	IL1C	IL-3	clones_and_cells	FALSE	GT	SCcaller	2268435	2268371	284749	3143333	0.8885	0.4192	0.5696
79	IL1C	IL-3	clones_and_cells	FALSE	GT	Prosolo	3052524	3052946	13242252	2358609	0.1874	0.5641	0.2813
80	IL1C	IL-4	clones_and_cells	FALSE	GT	Octopus	4420245	4456285	371215	990996	0.9231	0.8169	0.8667
81	IL1C	IL-4	clones_and_cells	FALSE	GT	MonoVar	3502962	3503510	1774639	1907220	0.6638	0.6475	0.6555
82	IL1C	IL-4	clones_and_cells	FALSE	GT	SCcaller	2108643	2108572	156124	3303125	0.9311	0.3896	0.5494
83	IL1C	IL-4	clones_and_cells	FALSE	GT	Prosolo	3167671	3168088	9408295	2243704	0.2519	0.5854	0.3522
84	IL1C	IL-5	clones_and_cells	FALSE	GT	Octopus	4420614	4456634	371057	990647	0.9231	0.8169	0.8668
85	IL1C	IL-5	clones_and_cells	FALSE	GT	MonoVar	3539275	3539761	1750923	1869204	0.6691	0.6544	0.6616
86	IL1C	IL-5	clones_and_cells	FALSE	GT	SCcaller	2085588	2085510	146713	3326180	0.9343	0.3854	0.5457
87	IL1C	IL-5	clones_and_cells	FALSE	GT	Prosolo	3171838	3172313	9050955	2239604	0.2595	0.5861	0.3598
88	IL1C	IL11	clones_and_cells	FALSE	GT	Octopus	4421821	4457890	369522	989458	0.9235	0.8171	0.8671
89	IL1C	IL11	clones_and_cells	FALSE	GT	MonoVar	3604866	3605420	1749796	1805499	0.6733	0.6663	0.6698
90	IL1C	IL11	clones_and_cells	FALSE	GT	SCcaller	2715185	2715147	206243	2696572	0.9294	0.5017	0.6517
91	IL1C	IL11	clones_and_cells	FALSE	GT	Prosolo	3188871	3189325	8511675	2222416	0.2726	0.5893	0.3727
92	IL1C	IL12	clones_and_cells	FALSE	GT	Octopus	4415765	4451742	371975	995527	0.9229	0.816	0.8662
93	IL1C	IL12	clones_and_cells	FALSE	GT	MonoVar	3093295	3093750	1860162	2317255	0.6245	0.5717	0.5969
94	IL1C	IL12	clones_and_cells	FALSE	GT	SCcaller	2082407	2082406	288785	3329361	0.8782	0.3848	0.5351
95	IL1C	IL12	clones_and_cells	FALSE	GT	Prosolo	3036572	3036920	12601357	2374628	0.1942	0.5612	0.2885
96	Hunamp	IL-2	clones_and_cells	TRUE	AL	Octopus	4262324	4271149	388997	176658	0.9165	0.9602	0.9379
97	Hunamp	IL-2	clones_and_cells	TRUE	AL	MonoVar	3595182	3596049	1891316	843793	0.6553	0.8099	0.7245
98	Hunamp	IL-2	clones_and_cells	TRUE	AL	SCcaller	2683650	2683594	23787	1755332	0.9912	0.6046	0.751
99	Hunamp	IL-2	clones_and_cells	TRUE	AL	Prosolo	2913567	2913969	619251	1525415	0.8247	0.6564	0.731
100	Hunamp	IL-3	clones_and_cells	TRUE	AL	Octopus	4258218	4267027	389607	180764	0.9163	0.9593	0.9373
101	Hunamp	IL-3	clones_and_cells	TRUE	AL	MonoVar	3289185	3289944	1693420	1149797	0.6602	0.741	0.6983
102	Hunamp	IL-3	clones_and_cells	TRUE	AL	SCcaller	2185439	2185398	19742	2253543	0.991	0.4923	0.6579
103	Hunamp	IL-3	clones_and_cells	TRUE	AL	Prosolo	2865766	2866129	618192	1573216	0.8226	0.6456	0.7234
104	Hunamp	IL-4	clones_and_cells	TRUE	AL	Octopus	4261417	4270236	390345	177565	0.9162	0.96	0.9376
105	Hunamp	IL-4	clones_and_cells	TRUE	AL	MonoVar	3489520	3490291	1829136	949462	0.6561	0.7861	0.7153
106	Hunamp	IL-4	clones_and_cells	TRUE	AL	SCcaller	1922081	1922025	13379	2516901	0.9931	0.433	0.6031
107	Hunamp	IL-4	clones_and_cells	TRUE	AL	Prosolo	2911349	2911739	617515	1527633	0.825	0.6559	0.7308
108	Hunamp	IL-5	clones_and_cells	TRUE	AL	Octopus	4261763	4270582	390215	177219	0.9163	0.9601	0.9377
109	Hunamp	IL-5	clones_and_cells	TRUE	AL	MonoVar	3511143	3511930	1819921	927839	0.6587	0.791	0.7188
110	Hunamp	IL-5	clones_and_cells	TRUE	AL	SCcaller	1888531	1888483	12369	2550451	0.9935	0.4254	0.5958
111	Hunamp	IL-5	clones_and_cells	TRUE	AL	Prosolo	2913150	2913533	614499	1525832	0.8258	0.6563	0.7313
112	Hunamp	IL11	clones_and_cells	TRUE	AL	Octopus	4261973	4270796	389693	177009	0.9164	0.9601	0.9377
113	Hunamp	IL11	clones_and_cells	TRUE	AL	MonoVar	3551809	3552656	1834971	887173	0.6594	0.8001	0.723
114	Hunamp	IL11	clones_and_cells	TRUE	AL	SCcaller	2477860	2477803	21721	1961122	0.9913	0.5582	0.7142
115	Hunamp	IL11	clones_and_cells	TRUE	AL	Prosolo	2911712	2912086	617213	1527270	0.8251	0.6559	0.7309
116	Hunamp	IL12	clones_and_cells	TRUE	AL	Octopus	4257875	4266700	390310	181107	0.9162	0.9592	0.9372
117	Hunamp	IL12	clones_and_cells	TRUE	AL	MonoVar	3249803	3250647	1732535	1189179	0.6523	0.7321	0.6899
118	Hunamp	IL12	clones_and_cells	TRUE	AL	SCcaller	2015408	2015388	19899	2423574	0.9902	0.454	0.6226
119	Hunamp	IL12	clones_and_cells	TRUE	AL	Prosolo	2861828	2862144	620611	1577154	0.8218	0.6447	0.7226
120	IL1C	IL-2	clones_and_cells	TRUE	AL	Octopus	4268562	4277407	382728	174832	0.9179	0.9607	0.9388
121	IL1C	IL-2	clones_and_cells	TRUE	AL	MonoVar	3598738	3599646	1887728	844649	0.656	0.8099	0.7249
122	IL1C	IL-2	clones_and_cells	TRUE	AL	SCcaller	2684451	2684391	22991	1758943	0.9915	0.6041	0.7508
123	IL1C	IL-2	clones_and_cells	TRUE	AL	Prosolo	2916708	2917130	616095	1526686	0.8256	0.6564	0.7314
124	IL1C	IL-3	clones_and_cells	TRUE	AL	Octopus	4264460	4273286	383336	178934	0.9177	0.9597	0.9382
125	IL1C	IL-3	clones_and_cells	TRUE	AL	MonoVar	3292371	3293153	1690227	1151023	0.6608	0.741	0.6986
126	IL1C	IL-3	clones_and_cells	TRUE	AL	SCcaller	2186222	2186185	18960	2257172	0.9914	0.492	0.6577
127	IL1C	IL-3	clones_and_cells	TRUE	AL	Prosolo	2868723	2869107	615222	1574671	0.8234	0.6456	0.7238
128	IL1C	IL-4	clones_and_cells	TRUE	AL	Octopus	4267666	4276503	384064	175728	0.9176	0.9605	0.9385
129	IL1C	IL-4	clones_and_cells	TRUE	AL	MonoVar	3492743	3493537	1825898	950651	0.6567	0.7861	0.7156
130	IL1C	IL-4	clones_and_cells	TRUE	AL	SCcaller	1922521	1922466	12939	2520873	0.9933	0.4327	0.6028
131	IL1C	IL-4	clones_and_cells	TRUE	AL	Prosolo	2914477	2914887	614376	1528917	0.8259	0.6559	0.7312
132	IL1C	IL-5	clones_and_cells	TRUE	AL	Octopus	4267994	4276839	383945	175400	0.9176	0.9605	0.9386
133	IL1C	IL-5	clones_and_cells	TRUE	AL	MonoVar	3514150	3514943	1816908	929244	0.6592	0.7909	0.7191
134	IL1C	IL-5	clones_and_cells	TRUE	AL	SCcaller	1888740	1888692	12158	2554654	0.9936	0.4251	0.5954
135	IL1C	IL-5	clones_and_cells	TRUE	AL	Prosolo	2916235	2916632	611401	1527159	0.8267	0.6563	0.7317
136	IL1C	IL11	clones_and_cells	TRUE	AL	Octopus	4268275	4277118	383360	175119	0.9177	0.9606	0.9387
137	IL1C	IL11	clones_and_cells	TRUE	AL	MonoVar	3555229	3556102	1831533	888165	0.66	0.8001	0.7234
138	IL1C	IL11	clones_and_cells	TRUE	AL	SCcaller	2478541	2478486	21039	1964853	0.9916	0.5578	0.714
139	IL1C	IL11	clones_and_cells	TRUE	AL	Prosolo	2914855	2915247	614056	1528539	0.826	0.656	0.7313
140	IL1C	IL12	clones_and_cells	TRUE	AL	Octopus	4264159	4272995	383994	179235	0.9175	0.9597	0.9381
141	IL1C	IL12	clones_and_cells	TRUE	AL	MonoVar	3252896	3253755	1729427	1190498	0.6529	0.7321	0.6903
142	IL1C	IL12	clones_and_cells	TRUE	AL	SCcaller	2016115	2016097	19190	2427279	0.9906	0.4537	0.6224
143	IL1C	IL12	clones_and_cells	TRUE	AL	Prosolo	2864677	2865008	617748	1578717	0.8226	0.6447	0.7229
144	Hunamp	IL-2	clones_and_cells	FALSE	AL	Octopus	4429534	4438637	388434	471625	0.9195	0.9038	0.9116
145	Hunamp	IL-2	clones_and_cells	FALSE	AL	MonoVar	3711333	3712446	1774632	1189786	0.6766	0.7572	0.7146
146	Hunamp	IL-2	clones_and_cells	FALSE	AL	SCcaller	3129717	3129581	21418	1771442	0.9932	0.6386	0.7773
147	Hunamp	IL-2	clones_and_cells	FALSE	AL	Prosolo	3157954	3158840	7755914	1743204	0.2894	0.6443	0.3994
148	Hunamp	IL-3	clones_and_cells	FALSE	AL	Octopus	4425205	4434312	389046	475954	0.9193	0.9029	0.911
149	Hunamp	IL-3	clones_and_cells	FALSE	AL	MonoVar	3387774	3388750	1594837	1513385	0.68	0.6912	0.6856
150	Hunamp	IL-3	clones_and_cells	FALSE	AL	SCcaller	2535623	2535510	17514	2365536	0.9931	0.5174	0.6803
151	Hunamp	IL-3	clones_and_cells	FALSE	AL	Prosolo	3108832	3109714	13212625	1792326	0.1905	0.6343	0.293
152	Hunamp	IL-4	clones_and_cells	FALSE	AL	Octopus	4428589	4437704	389870	472570	0.9192	0.9036	0.9113
153	Hunamp	IL-4	clones_and_cells	FALSE	AL	MonoVar	3593498	3594493	1725139	1307660	0.6757	0.7332	0.7033
154	Hunamp	IL-4	clones_and_cells	FALSE	AL	SCcaller	2253177	2253069	11531	2647982	0.9949	0.4597	0.6289
155	Hunamp	IL-4	clones_and_cells	FALSE	AL	Prosolo	3151050	3151968	9442696	1750109	0.2503	0.6429	0.3603
156	Hunamp	IL-5	clones_and_cells	FALSE	AL	Octopus	4428838	4437940	389818	472321	0.9193	0.9036	0.9114
157	Hunamp	IL-5	clones_and_cells	FALSE	AL	MonoVar	3615767	3616780	1715063	1285386	0.6783	0.7377	0.7068
158	Hunamp	IL-5	clones_and_cells	FALSE	AL	SCcaller	2220869	2220754	11393	2680290	0.9949	0.4531	0.6227
159	Hunamp	IL-5	clones_and_cells	FALSE	AL	Prosolo	3151727	3152468	9087040	1749432	0.2576	0.6431	0.3678
160	Hunamp	IL11	clones_and_cells	FALSE	AL	Octopus	4429125	4438222	389223	472034	0.9194	0.9037	0.9115
161	Hunamp	IL11	clones_and_cells	FALSE	AL	MonoVar	3657522	3658596	1729227	1243636	0.679	0.7463	0.7111
162	Hunamp	IL11	clones_and_cells	FALSE	AL	SCcaller	2899676	2899550	21705	2001483	0.9926	0.5916	0.7414
163	Hunamp	IL11	clones_and_cells	FALSE	AL	Prosolo	3157545	3158414	8564157	1743614	0.2694	0.6442	0.38
164	Hunamp	IL12	clones_and_cells	FALSE	AL	Octopus	4424680	4433805	389952	476479	0.9192	0.9028	0.9109
165	Hunamp	IL12	clones_and_cells	FALSE	AL	MonoVar	3348954	3349985	1633375	1552204	0.6722	0.6833	0.6777
166	Hunamp	IL12	clones_and_cells	FALSE	AL	SCcaller	2352770	2352700	18395	2548389	0.9922	0.48	0.647
167	Hunamp	IL12	clones_and_cells	FALSE	AL	Prosolo	3100864	3101562	12560541	1800295	0.198	0.6327	0.3016
168	IL1C	IL-2	clones_and_cells	FALSE	AL	Octopus	4488756	4497742	329527	923012	0.9317	0.8294	0.8776
169	IL1C	IL-2	clones_and_cells	FALSE	AL	MonoVar	3747204	3748426	1738741	1664525	0.6831	0.6924	0.6877
170	IL1C	IL-2	clones_and_cells	FALSE	AL	SCcaller	3133751	3133584	17408	2278017	0.9945	0.5791	0.7319
171	IL1C	IL-2	clones_and_cells	FALSE	AL	Prosolo	3260933	3261968	7652895	2150802	0.2989	0.6026	0.3995
172	IL1C	IL-3	clones_and_cells	FALSE	AL	Octopus	4484251	4493253	330305	927517	0.9315	0.8286	0.8771
173	IL1C	IL-3	clones_and_cells	FALSE	AL	MonoVar	3417991	3419081	1564597	1993777	0.6861	0.6316	0.6577
174	IL1C	IL-3	clones_and_cells	FALSE	AL	SCcaller	2538788	2538656	14357	2872980	0.9944	0.4691	0.6375
175	IL1C	IL-3	clones_and_cells	FALSE	AL	Prosolo	3211608	3212609	13109748	2200134	0.1968	0.5935	0.2956
176	IL1C	IL-4	clones_and_cells	FALSE	AL	Octopus	4487782	4496794	330975	923986	0.9314	0.8293	0.8774
177	IL1C	IL-4	clones_and_cells	FALSE	AL	MonoVar	3626257	3627337	1692384	1785510	0.6819	0.6701	0.6759
178	IL1C	IL-4	clones_and_cells	FALSE	AL	SCcaller	2255256	2255128	9461	3156512	0.9958	0.4167	0.5876
179	IL1C	IL-4	clones_and_cells	FALSE	AL	Prosolo	3256365	3257424	9337287	2155403	0.2586	0.6017	0.3618
180	IL1C	IL-5	clones_and_cells	FALSE	AL	Octopus	4487956	4496953	331009	923812	0.9314	0.8293	0.8774
181	IL1C	IL-5	clones_and_cells	FALSE	AL	MonoVar	3646845	3647934	1683790	1764909	0.6842	0.6739	0.679
182	IL1C	IL-5	clones_and_cells	FALSE	AL	SCcaller	2222654	2222518	9614	3189114	0.9957	0.4107	0.5815
183	IL1C	IL-5	clones_and_cells	FALSE	AL	Prosolo	3253778	3254652	8984901	2157990	0.2659	0.6012	0.3687
184	IL1C	IL11	clones_and_cells	FALSE	AL	Octopus	4488657	4497661	329990	923111	0.9316	0.8294	0.8776
185	IL1C	IL11	clones_and_cells	FALSE	AL	MonoVar	3691007	3692184	1695724	1720760	0.6853	0.682	0.6836
186	IL1C	IL11	clones_and_cells	FALSE	AL	SCcaller	2903345	2903193	18046	2508423	0.9938	0.5365	0.6968
187	IL1C	IL11	clones_and_cells	FALSE	AL	Prosolo	3261918	3262902	8459478	2149826	0.2783	0.6027	0.3808
188	IL1C	IL12	clones_and_cells	FALSE	AL	Octopus	4484210	4493222	330735	927558	0.9314	0.8286	0.877
189	IL1C	IL12	clones_and_cells	FALSE	AL	MonoVar	3380134	3381270	1602182	2031633	0.6785	0.6246	0.6504
190	IL1C	IL12	clones_and_cells	FALSE	AL	SCcaller	2356236	2356145	14943	3055532	0.9937	0.4354	0.6055
191	IL1C	IL12	clones_and_cells	FALSE	AL	Prosolo	3203337	3204166	12457994	2208431	0.2046	0.5919	0.3041
